# Supplementary material for: Haplotype Shuffling and Dimorphic Transposable Elements in the Human Extended Major Histocompatibility Complex Class II Region
Source: Front Genet. 2021 May 28;12:665899. doi: 10.3389/fgene.2021.665899 (PMC8193847; doi:10.3389/fgene.2021.665899)
Supplement: Supplementary file 6 [file Table_6.XLSX]

## Sheet: ST3
Supplementary Table 6. Different 14-loci and 19-loci haplotypes linked with HLA-DRB1/DQA1/DQB1/ MTCO3P1 allelic lineages.
		TE indel	HLA-DRB1	AluDRB1	AluMER66	AluDQA1	HLA-DQA1	AluHAL	HLA-DQB1	AluDQB1	LTR13	LTR33	AluMT1	AluMT2	AluMT3	MTCO3P1	AluDQA2	AluDOB2	AluDOB1	AluDPB2	LTR42.DOB
		TE ID		#4	#5	#6		#10		#11	#39		#13	#14	#15		#16	#17	#18	#19	#43
Cell-line	Hap ID	14-loci	1	2	3	4	5	6	7	8	9	10	11	12	13	14	15	16	17	18	19	19-loci
		HAP# DRB1 to MTCO3P1																				HAP# DRB1 to LTR42
JESTHOM	47	1.1	DRB1*01	2	2	1	DQA1*01:01:01	2	DQB1*05:01	1	1	0	1	2	2	MTCO3P1*09	1	1	2	2	1	1.1
SA	63	1.2	DRB1*01	2	2	1	DQA1*01:01:01	2	DQB1*05:01	1	1	0	1	2	2	MTCO3P1*09	1	1	2		1	1.2
WT100BIS	1	1.3	DRB1*01	2	2	1	DQA1*01:01:01	2	DQB1*05:01	1	1	0	1	2	2	MTCO3P1*09	1	1	2	2	1	1.3
KAS116	94	1.4	DRB1*01	2	2	1	DQA1*01:01:01	2	DQB1*05:01	1	1	0	1	2	2	MTCO3P1*09	1	1	1	1	1	2.1
MZO70782	81	1.5	DRB1*01	2	2	1	DQA1*01:01:02	2	DQB1*05:01	1	1	0	1	2	2	MTCO3P1*09	2	1	2	2	1	3.1
WT49	8	2.1	DRB1*03	1	1	1	DQA1*05:01	0	DQB1*02:01	2	1	0	1	2	2	MTCO3P1*01	1	1	2	2	1	4.1
LO081785	18	2.2	DRB1*03	1	1	1	DQA1*05:01	0	DQB1*02:01	2	1	0	1	1	1	MTCO3P1*01	1	1	1	1	1	5.1
EJ32B	25	2.3	DRB1*03	1	1	1	DQA1*05:01	0	DQB1*02:01	2	1	0	1	1	1	MTCO3P1*01	1	2	1	1	2	6.1
DUCAF	26	2.4	DRB1*03	1	1	1	DQA1*05:01	0	DQB1*02:01	2	1	0	1	1	1	MTCO3P1*01	1	2	1	1	2	6.2
STEINLIN	12	2.5	DRB1*03	1	1	1	DQA1*05:01	0	DQB1*02:01	2	1	0	1	1	1	MTCO3P1*01	2					7.1
PF04015	16	2.6	DRB1*03	1	1	1	DQA1*05:01	0	DQB1*02:01	2	1	0	1	1	1	MTCO3P1*01	2	1	1		1	7.2
VAVY	11	2.7	DRB1*03	1	1	1	DQA1*05:01	0	DQB1*02:01	2	1	0	1	1	1	MTCO3P1*01	2	1	1	2	1	7.3
LO541265	19	2.8	DRB1*03	1	1	1	DQA1*05:01	0	DQB1*02:01	2	1	0	1	1	1	MTCO3P1*01	2	1	1		1	7.4
COX	27	2.9	DRB1*03	1	1	1	DQA1*05:01	0	DQB1*02:01	2	1	0	1	1	1	MTCO3P1*01	2	1	1	1	1	7.5
QBL	15	2.10	DRB1*03	1	1	1	DQA1*05:01	0	DQB1*02:01	2	1	0	1	1	1	MTCO3P1*01	1	1	1	1	1	8.1
RSH	14	3.1	DRB1*03	1	1	1	DQA1*04	0	DQB1*04:02	1	1	0	1	1	2	MTCO3P1*07	1	1	1	1	1	9.1
WT51	65	4.1	DRB1*04	1	1	2	DQA1*03:01:01	0	DQB1*03:02	1	2	0	1	1	1	MTCO3P1*08	1	2	1	1	2	10.1
BSM	40	4.2	DRB1*04	1	1	2	DQA1*03:01:01	0	DQB1*03:02	1	2	0	1	1	1	MTCO3P1*08	1	1	1	1	1	11.1
BM14	4	4.3	DRB1*04	1	1	2	DQA1*03:01:01	0	DQB1*03:02	1	2	0	1	1	1	MTCO3P1*08	1	2	1	1	2	10.2
BOLETH	41	4.4	DRB1*04	1	1	2	DQA1*03:01:01	0	DQB1*03:02	1	2	0	1	1	1	MTCO3P1*08	1	1	1	2	1	12.1
YAR	64	4.5	DRB1*04	1	1	2	DQA1*03:01:01	0	DQB1*03:02	1	2	0	1	1	1	MTCO3P1*08	1	2	1	1	2	10.3
MT14B	82	4.6	DRB1*04	1	1	2	DQA1*03:01:01	0	DQB1*03:02	1	2	0	1	1	1	MTCO3P1*08	1	2	1		2	10.4
ISH3	48	4.7	DRB1*04	1	1	2	DQA1*03:01:01	0	DQB1*03:02	1	2	0	1	1	1	MTCO3P1*08	1	2	1	1	2	10.5
SSTO	72	4.8	DRB1*04	1	1	2	DQA1*03:01:01	0	DQB1*03:05	1	2	0	1	1	1	MTCO3P1*08	1	2	2	1	1	13.1
DEU	35	5.1	DRB1*04	1	1	2	DQA1*03:03:01	0	DQB1*03:01	1	2	0	1	2	2	MTCO3P1*10	1	1	1	1	1	14.1
AWELLS	60	6.1	DRB1*04	1	1	2	DQA1*03:03:01	2	DQB1*03:01	1	1	2	1	2	2	MTCO3P1*03	1	1	1		1	15.1
MCF	85	6.2	DRB1*04	1	1	2	DQA1*03:03:01	0	DQB1*03:01	1	1	2	1	2	2	MTCO3P1*03	1	1	1	2	2	16.1
JHAF	46	6.3	DRB1*04	1	1	2	DQA1*03:03:01	0	DQB1*03:01	1	1	2	1	2	2	MTCO3P1*03	1	1	1	1	1	15.2
LKT3	89	7.1	DRB1*04	1	1	2	DQA1*03:03:01	0	DQB1*04:01	1	2	0	1	2	2	MTCO3P1*07	1	1	2	2	1	17.1
IBW9	49	8.1	DRB1*07	1	1	2	DQA1*02:01	0	DQB1*02:02	2	1	0	2	2	2	MTCO3P1*04	1	2	1	2	2	18.1
BH	55	8.2	DRB1*07	1	1	2	DQA1*02:01	0	DQB1*02:02	2	1	0	2	2	2	MTCO3P1*04	1	1	2		1	19.1
LBF	91	8.3	DRB1*07	1	1	2	DQA1*02:01	0	DQB1*02:02	2	1	0	2	2	2	MTCO3P1*04	1	1	2	1	1	19.2
BER	57	8.4	DRB1*07	1	1	2	DQA1*02:01	0	DQB1*02:02	2	1	0	2	2	2	MTCO3P1*04	1	1	2		1	19.3
PITOUT	78	8.5	DRB1*07	1	1	2	DQA1*02:01	0	DQB1*02:02	2	1	0	2	2	2	MTCO3P1*04	1	2	1	2	2	18.2
MOU	83	8.6	DRB1*07	1	1	2	DQA1*02:01	0	DQB1*02:02	2	1	0	2	2	2	MTCO3P1*04	1	2	1	1	2	20.1
PLH	77	8.7	DRB1*07	1	1	2	DQA1*02:01	0	DQB1*02:02	2	1	0	2	2	2	MTCO3P1*04	1	2	1	1	2	20.2
BEI	58	9.1	DRB1*07	1	1	2	DQA1*02:01	0	DQB1*03:03	1	2	2	1	2	2	MTCO3P1*03	1	1	2	2	1	21.1
DBB	37	9.2	DRB1*07	1	1	2	DQA1*02:01	0	DQB1*03:03	1	2	2	1	2	2	MTCO3P1*03	1	1	2	2	1	21.2
SPL	73	10.1	DRB1*08	1	1	2	DQA1*04	0	DQB1*04:02	1	2	0	1	2	2	MTCO3P1*07	1	1	2	2	1	22.1
MADURA	86	10.2	DRB1*08	1	1	2	DQA1*04	0	DQB1*04:02	1	2	0	1	2	2	MTCO3P1*07	1	1	2	2	1	22.2
BM09	54	10.3	DRB1*08	1	1	2	DQA1*04	0	DQB1*04:02	1	2	0	1	2	2	MTCO3P1*07	1	1	2	1	1	23.1
KRC005	92	10.4	DRB1*08	1	1	2	DQA1*04	0	DQB1*04:02	1	2	0	1	2	2	MTCO3P1*07	1	1	1	2	1	24.1
BTB	39	10.5	DRB1*08	1	1	2	DQA1*04	0	DQB1*04:02	1	2	0	1	2	2	MTCO3P1*07	1	1	1	2	1	24.2
TAB	70	11.1	DRB1*08	1	1	1	DQA1*01:03	0	DQB1*06:01	1	1	0	1	1	1	MTCO3P1*09	1	1	2	1	1	25.1
LUY	88	12.1	DRB1*08	1	1	2	DQA1*06	0	DQB1*03:01	1	1	2	1	2	2	MTCO3P1*03	1	1	2		1	25.2
DKB	34	13.1	DRB1*09	1	1	2	DQA1*03:02	0	DQB1*03:03	1	2	2	1	2	2	MTCO3P1*03	1	2	1	1	2	26.1
T7526	3	13.2	DRB1*09	1	1	2	DQA1*03:02	0	DQB1*03:03	1	2	2	1	2	2	MTCO3P1*03	1	2	1	1	2	26.2
SP0010	74	14.1	DRB1*11	1	1	2	DQA1*01:02:02	0	DQB1*05:02	1	1	2	1	2	2	MTCO3P1*03	1	1	1	1	2	27.1
BM21	29	15.1	DRB1*11	1	1	1	DQA1*05:05	0	DQB1*03:01	1	1	2	1	2	2	GAP	1	1	1	1	1	28.1
JBUSH	22	15.2	DRB1*11	1	1	1	DQA1*05:05	0	DQB1*03:01	1	1	2	1	2	2	GAP	1	1	1	1	1	28.2
SWEIG	71	16.1	DRB1*11	1	1	1	DQA1*05:05	0	DQB1*03:01	1	1	0	1	2	2	MTCO3P1*03						30.1
JVM	5	16.2	DRB1*11	1	1	1	DQA1*05:05	0	DQB1*03:01	1	1	2	1	2	2	MTCO3P1*03	1	2	1	1	2	31.1
BM15	42	16.3	DRB1*11	1	1	1	DQA1*05:05	0	DQB1*03:19	1	1	2	1	2	2	MTCO3P1*03	2	1	1	2	1	32.1
TISI	68	16.4	DRB1*11	1	1	1	DQA1*05:05	0	DQB1*03:01	1	1	2	1	2	2	MTCO3P1*03	1	1	1	2	1	33.1
JO528239	45	16.5	DRB1*11	1	1	1	DQA1*05:05	0	DQB1*03:01	1	1	2	1	2	2	MTCO3P1*03	1	1	1		1	33.2
BM16	30	17.1	DRB1*12	1	1	1	DQA1*05:05	0	DQB1*03:01	1	1	2	1	1	1	GAP	1	1	1	1	1	34
FPAF	23	18.1	DRB1*11	1	1	1	DQA1*01:03	0	DQB1*06:03	1	1	0	1	1	1	MTCO3P1*02	1	1	1	1	2	35.1
OMW	80	19.1	DRB1*13	1	1	1	DQA1*01:03:	2	DQB1*06:03	1	1	0	1	1	1	MTCO3P1*02	1	2	1	2	2	36.1
APD	31	19.2	DRB1*13	1	1	1	DQA1*01:03	2	DQB1*06:03	1	1	0	1	1	1	MTCO3P1*02	2	1	2	2	1	37.1
CB6B	28	19.3	DRB1*13	1	1	1	DQA1*01:03	2	DQB1*06:03	1	1	0	1	1	1	MTCO3P1*02	2	1	2	1	1	38.1
WDV	10	19.4	DRB1*13	1	1	1	DQA1*01:03	2	DQB1*06:03	1	1	0	1	2	2	MTCO3P1*02	1	1	1		1	39.1
HOR	50	20.1	DRB1*13	1	1	1	DQA1*01:02	2	DQB1*06:04	1	1	0	1	1	1	MTCO3P1*05	1	2	1	1	2	40.1
WT47	9	20.2	DRB1*13	1	1	1	DQA1*01:02	2	DQB1*06:04	1	1	0	1	1	1	MTCO3P1*05	1	2	1	1	2	40.2
SLE005	13	20.3	DRB1*13	1	1	1	DQA1*01:02	2	DQB1*06:04	1	1	0	1	1	1	MTCO3P1*05	1	2	1		2	40.3
KOSE	20	21.1	DRB1*13	1	1	1	DQA1*01:02	0	DQB1*05:03:01:01	1	1	0	1	1	1	MTCO3P1*01/05	1	1	1	1	1	41.1
LZL	17	22.1	DRB1*14	1	1	1	DQA1*05:03	0	DQB1*03:01	1	1	0	1	2	2	GAP	1	1	1	2	1	42.1
AMALA	32	22.2	DRB1*14	1	1	1	DQA1*05:03	0	DQB1*03:01	1	1	0	1	2	2	GAP	1	1	1	2	1	42.2
TEM	69	23.1	DRB1*14	1	1	1	DQA1*01:04	2	DQB1*05:03	1	1	0	1	1	1	MTCO3P1*06	1	2	1	2	2	43.1
EK	24	23.2	DRB1*14	1	1	1	DQA1*01:04	2	DQB1*05:03	1	1	0	1	1	1	MTCO3P1*06	2	1	2	2	1	44.1
31227ABO	33	23.3	DRB1*14	1	1	1	DQA1*01:04	0	DQB1*05:03	1	1	0	1	2	2	MTCO3P1*06	1	1	1	1	1	45.1
KGU	21	24.1	DRB1*14	1	1	1	DQA1*01:04	2	DQB1*06:01	1	1	0	2	1	1	GAP	1	1	1	1	1	46.1
AMA1	61	25.1	DRB1*15	2	1	2	DQA1*01:02	2	DQB1*06:02	1	1	0	1	0	1	MTCO3P1*02	1	2	1	2	2	47.1
HO104	51	25.2	DRB1*15	2	1	2	DQA1*01:02	2	DQB1*06:02	1	1	0	1	1	1	MTCO3P1*02	1	2	1	2	2	47.2
LD2B	90	25.3	DRB1*15	2	1	2	DQA1*01:02	2	DQB1*06:02	1	1	0	1	1	1	MTCO3P1*02	1	2	1	2	2	47.3
EA	52	25.4	DRB1*15	2	1	2	DQA1*01:02	2	DQB1*06:02	1	1	0	1	1	1	MTCO3P1*02	1	2	1		2	47.4
SCHU	75	25.6	DRB1*15	2	1	2	DQA1*01:02	2	DQB1*06:02	1	1	0	1	1	1	MTCO3P1*02	1	2	1		2	47.5
MGAR	84	25.7	DRB1*15	2	1	2	DQA1*01:02	2	DQB1*06:02	1	1	0	1	2	2	MTCO3P1*02	1	1	1	2	1	48.1
PGF	6	25.8	DRB1*15	2	1	2	DQA1*01:02	2	DQB1*06:02	1	1	0	1	1	1	MTCO3P1*02	1	2	1	2	2	47.6
AKIBA	62	26.1	DRB1*15	2	1	2	DQA1*01:03	2	DQB1*06:01	1	1	0	1	1	1	MTCO3P1*04	1	1	1	1	1	49.1
KAWASAKI	93	26.2	DRB1*15	2	1	2	DQA1*01:03	0	DQB1*06:01	1	1	0	2	1	1	MTCO3P1*04	1	1	1	1	1	49.2
E481324	53	26.3	DRB1*15	2	1	2	DQA1*01:03	0	DQB1*06:01	1	1	0	2	1	1	MTCO3P1*04	1					49.3
BGE	56	27.1	DRB1*15	1	1	1	DQA1*01:03	2	DQB1*06:01	1	1	0	1	2	2	MTCO3P1*03						50.1
AZH	59	28.1	DRB1*16	2	1	2	DQA1*01:02	0	DQB1*05:02	1	1	2	1	2	2	MTCO3P1*03	1	1	1	1	1	51.1
CALEGORO	38	28.2	DRB1*16	2	1	2	DQA1*01:02	0	DQB1*05:02	1	1	2	1	1	1	MTCO3P1*03	1	1	1	1	1	51.2
KAS011	43	28.3	DRB1*16	2	1	2	DQA1*01:02	0	DQB1*05:02	1	1	2	1	2	2	MTCO3P1*03	1	1	1		1	51.3
WT24	66	28.4	DRB1*16	2	1	2	DQA1*01:02	2	DQB1*05:02	1	1	2	1	2	2	MTCO3P1*03	1	1	1	1	1	51.4
WJRO76	95	28.5	DRB1*16	2	1	2	DQA1*01:02	2	DQB1*05:02	1	1	2	1	2	2	MTCO3P1*03	1	2	1	1	2	52.1
RML	76	29.1	DRB1*16	2	1	2	DQA1*05:05	0	DQB1*03:01	1	1	2	1	2	2	MTCO3P1*03	1	1	2	2	1	53.1
WAR	67	29.2	DRB1*16	2	1	1	DQA1*05:05	0	DQB1*03:01	1	1	2	1	2	2	MTCO3P1*03	1	1	2	2	1	53.2
		TE ID		#4	#5	#6		#10		#11	#39		#13	#14	#15		#16	#17	#18	#19	#43
		TE indel	HLA-DRB1	AluDRB1	AluMER66	AluDQA1	HLA-DQA1	AluHAL	HLA-DQB1	AluDQB1	LTR13	LTR33	AluMT1	AluMT2	AluMT3	MTCO3P1	AluDQA2	AluDOB2	AluDOB1	AluDPB2	LTR42.DOB
The numbers 1 or 0 within the matrix represent the absence of the TE element, whereas 2 represents the presence of the TE element. The same or highly similar haplotypes are shaded and blocked accordingly with a haplotype identifier HAP#. The yellow, orange and pink boxes highlight discordant alleles and absence of data.
The HLA allele numbers are abbreviated here to focus on the allele lineage (first two numbers after * and before the :). The full allele set of numbers for each HLA-DRB1, -DQA1, and -DQB1 sequence are presented in Supplementary Tables 1, 2 and 4.
