# Supplementary material for: Haplotype Shuffling and Dimorphic Transposable Elements in the Human Extended Major Histocompatibility Complex Class II Region
Source: Front Genet. 2021 May 28;12:665899. doi: 10.3389/fgene.2021.665899 (PMC8193847; doi:10.3389/fgene.2021.665899)
Supplement: Supplementary file 7 [file Table_7.XLSX]

## Sheet: ST5
Supplementary Table 7. Number of different TE in the DRB haplotype region located between DRB9 and DRB1 gene loci
					Number of	Number of	Number of	Number of	Number of	Number of	Number of	Number of	Number of
Cell line	SCAFFOLD ACC	LAB ID	HLA-DRB345	DRB hap	U1	sLTR12	HERV9-LTR12	LTR22	MER77B	LTR14-	sLTR14	LTR43	LTR5	HLA-DRB1
										HERVK14
WT100BIS	CZVA02000001	1		DRB6	2	4	0	0	0	0	0	1	0	DRB1*01:01:01
T7526	CZUU02000001	3	DRB4*01:03:01:01	DRB7/DRB8	5	3	1	1	1	1	1	1	0	DRB1*09:01:02
BM14	CZTB02000001	4	DRB4*01:03:01:01	DRB7/DRB8	3	2	1	1	1	0	0	0	0	DRB1*04:01:01
JVM	CZSW02000001	5	DRB3*02:02:01:01	DRB2	5	2	1	0	0	0	0	0	1	DRB1*11:02:01
PGF	CZUC02000001	6	DRB5*01:01:01	DRB6	3	2	2	0	0	0	1	1	0	DRB1*15:01:01:01
WT49	CZVE02000001	8	DRB3*02:02:01:01	DRB2	3	2	1	0	0	0	0	0	2	DRB1*03:01:01:01
WT47	CZVD02000001	9	DRB3*03:01:01	DRB2	4	2	1	0	0	0	0	0	1	DRB1*13:02:01
WDV	CZUX02000001	10	DRB3*01:01:02:01	DRB2	5	2	1	0	0	0	0	0	2	DRB1*13:01:01
VAVY	CZUV02000001	11	DRB3*01:01:02:01	DRB2	3	2	1	0	0	0	0	0	1	DRB1*03:01:01:01
STEINLIN	CZUQ02000001	12	DRB3*01:01:02:01	DRB2	4	3	1	0	0	0	0	0	1	DRB1*03:01:01:01
SLE005	CZUL02000001	13	DRB3*03:01:01	DRB2	3	3	1	0	0	0	0	0	1	DRB1*13:02:01
RSH	CZUN02000001	14	DRB3*01:01:02:01	DRB2	3	2	1	0	0	0	0	0	0	DRB1*03:02:01
QBL	CZUB02000001	15	DRB3*02:02:01:01	DRB2	3	2	0	0	0	0	0	0	0	DRB1*03:01:01:02
PF04015	CZUA02000001	16	DRB3*01:01:02:01	DRB2	8	8	1	0	0	0	0	0	1	DRB1*03:01:01:01
LZL	CZTS02000001	17	DRB3*01:01:02:01	DRB2	3	3	1	0	0	0	0	0	1	DRB1*14:02:01
LO081785	CZTP02000001	18	DRB3*02:02:01:01	DRB2	3	2	1	0	0	0	0	0	0	DRB1*03:01:01:01
LO541265	CZTO02000001	19	DRB3*01:01:02:01	DRB2	3	7	1	0	0	0	0	0	0	DRB1*03:01:01:01
KOSE	CZTG02000001	20	DRB3*02:02:01:01	DRB2	2	2	1	0	0	0	0	0	1	DRB1*13:02:01
KGU	CZTJ02000001	21	DRB3*02:02:01:01	DRB2	4	2	1	0	0	0	0	0	1	DRB1*14:04
JBUSH	CZSB02000001	22	DRB3*02:02:01:01	DRB2	4	3	2	0	0	0	0	0	1	DRB1*11:01:01
FPAF	CZSK02000001	23	DRB3*02:02:01:01	DRB2	3	2	1	0	0	0	0	0	1	DRB1*11:04:01
EK	CZTD02000001	24	DRB3*02:02:01:01	DRB2	3	2	1	0	0	0	0	0	1	DRB1*14:54:01
EJ32B	CZSU02000001	25	DRB3*02:02:01:01	DRB2	4	3	1	0	0	0	0	0	1	DRB1*03:01:01:01
DUCAF	CZSO02000001	26	DRB3*02:02:01:01	DRB2	3	2	1	0	0	0	0	0	2	DRB1*03:01:01:01
COX	CVUC01000001.1	27	DRB3*01:01:02:01	DRB2	3	2	1	0	0	0	0	0	1	DRB1*03:01:01:01
CB6B	CZTK02000001	28	DRB3*02:02:01:01	DRB2	5	6	1	0	0	0	0	0	1	DRB1*13:01:01
BM21	CZRQ02000001	29	DRB3*02:02:01:01	DRB2	3	2	1	0	0	0	0	0	1	DRB1*11:01:01
BM16	CZRZ02000001	30	DRB3*02:02:01:01	DRB2	3	2	1	0	0	0	0	0	2	DRB1*12:01:01
APD	CZSY02000001	31	DRB3*02:02:01:01	DRB2	4	3	1	0	0	0	0	0	2	DRB1*13:01:01
AMALA	CZSS02000001	32	DRB3*01:01:02:01	DRB2	3	2	1	0	0	0	0	0	0	DRB1*14:02:01
31227ABO	CZSA02000001	33	DRB3*02:02:01:01	DRB2	3	2	0	0	0	0	0	0	0	DRB1*14:54:01
DKB	CZRY02000001	34	DRB4*01:03:02	DRB7/DRB8	4	2	3	1	1	0	0	0	0	DRB1*09:01:02
DEU	CZTA02000001	35	DRB4*01:03:01:01	DRB7/DRB8	5	3	5	1	1	1	2	1	0	DRB1*04:01:01
DBB	CZSV02000001	37	DRB4*01:03:01:02N	DRB7/DRB8	4	2	2	1	1	1	0	0	0	DRB1*07:01:01:02
CALEGORO	CZSL02000001	38	DRB5*02:02	DRB6	3	2	3	0	0	0	1	1	0	DRB1*16:01:01
BTB	CZRV02000001	39	0	0	1	1	0	0	0	0	0	0	0	DRB1*08:01:01
BSM	CZSN02000001	40	DRB4*01:03:01:01	DRB7/DRB8	3	2	1	1	1	1	0	0	0	DRB1*04:01:01
BOLETH	CZSX02000001	41	DRB4*01:03:01:01	DRB7/DRB8	4	2	2	1	1	1	0	0	0	DRB1*04:01:01
BM15	CZRT02000001	42	DRB3*02:02:01:01	DRB2	4	2	1	0	0	0	0	0	2	DRB1*11:02:01
KAS011	CZSP02000001	43	DRB5*02:02	DRB6	3	3	1	0	0	0	0	0	0	DRB1*16:01:01
JO528239	CZSF02000001	45	DRB3*02:02:01:01	DRB2	3	4	1	0	0	0	0	0	1	DRB1*11:04:01
JHAF	CZSQ02000001	46	DRB4*01:03:01:01	DRB7/DRB8	3	2	3	1	1	0	0	0	0	DRB1*04:07:01
JESTHOM	CZRX02000001	47		DRB6	4	2	2	0	0	0	0	1	0	DRB1*01:01:01
ISH3	CZRS02000001	48	DRB4*01:03:01:01	DRB7/DRB8	4	2	2	1	1	0	0	1	0	DRB1*04:06:01
IBW9	CZTH02000001	49	DRB4*01:01:01:01	DRB7/DRB8	4	2	2	1	1	0	0	1	0	DRB1*07:01:01:01
HOR	CZSJ02000001	50	DRB3*03:01:01	DRB2	4	1	1	0	0	0	0	0	1	DRB1*13:02:01
HO104	CZSG02000001	51	DRB5*01:01:01	DRB6	3	2	2	0	0	0	1	1	0	DRB1*15:01:01:01
EA	CZSH02000001	52	DRB5*01:01:01	DRB6	4	1	2	0	0	0	1	1	0	DRB1*15:01:01:01
E481324	CZRU02000001	53	DRB5*01:02	DRB6	3	2	2	0	0	0	1	1	0	DRB1*15:02:01
BM09	CZSM02000001	54	0	0	1	1	0	0	0	0	0	0	0	DRB1*08:01:01
BH	CZST02000001	55	DRB4*01:03:01:01	DRB7/DRB8	4	2	3	1	1	1	0	1	0	DRB1*07:01:01:01
BGE	CZSE02000001	56	DRB5*01:02	DRB6	4	2	1	0	0	0	0	0	1	DRB1*15:02:01
BER	CZRW02000001	57	DRB4*01:03:01:01	DRB7/DRB8	3	2	3	1	1	0	0	3	0	DRB1*07:01:01:01
BEI	CZSD02000001	58	DRB4*01:03:01:01	DRB7/DRB8	5	3	2	1	1	0	0	1	1	DRB1*07:01:01:01
AZH	CZRR02000001	59	DRB5*02:02	DRB6	3	4	2	0	0	0	1	1	0	DRB1*16:01:01
AWELLS	CZSZ02000001	60	DRB4*01:03:01:01	DRB7/DRB8	3	5	1	0	0	0	0	0	2	DRB1*04:01:01
AMA1	CZTF02000001	61	DRB5*01:01:01	DRB6	3	2	2	0	0	0	1	1	0	DRB1*15:03:01:02
AKIBA	CZTI02000001	62	DRB5*01:02	DRB6	3	2	2	0	0	0	1	1	0	DRB1*15:02:01
SA	CZUE02000001	63			2	2	2	0	0	0	0	2	0	DRB1*01:01:01
YAR	CZVB02000001	64	DRB4*01:03:01:01	DRB7/DRB8	3	2	3	1	1	0	0	1	0	DRB1*04:02:01
WT51	CZVF02000001	65	DRB4*01:03:01:01	DRB7/DRB8	4	2	3	1	1	0	0	0	0	DRB1*04:01:01
WT24	CZVC02000001	66	DRB5*02:02	DRB6	3	3	2	0	0	0	1	1	0	DRB1*16:01:01
WAR	CZUW02000001	67	DRB5*02:02	DRB6	4	2	2	0	0	0	1	1	0	DRB1*16:02:01
TISI	CZUT02000001	68	DRB3*02:02:01:01	DRB2	3	3	1	0	0	0	0	0	1	DRB1*11:03
TEM	CZUS02000001	69	DRB3*02:24	DRB2	3	4	1	0	0	0	0	0	1	DRB1*14:01:01
TAB	CZUR02000001	70	0	0	1	1	1	0	0	0	0	0	1	DRB1*08:03:02
SWEIG	CZUP02000001	71	DRB3*02:02:01:01	DRB2	4	2	1	0	0	0	0	0	1	DRB1*11:01:01
SSTO	CZUK02000001	72	DRB4*01:03:01:03	DRB7/DRB8	4	3	2	1	1	0	0	0	0	DRB1*04:03:01
SPL	CZUM02000001	73	0	0	1	1	1	0	0	0	0	0	0	DRB1*08
SP0010	CZUO02000001	74	DRB3*02:02:01:01	DRB2	4	2	3	1	1	1	0	1	0	DRB1*11:01:01
SCHU	CZUI02000001	75	DRB5*01:01:01	DRB6	3	2	2	0	0	0	1	1	0	DRB1*15:01:01:01
RML	CZUG02000001	76	DRB5*02:02	DRB6	3	1	2	0	0	0	1	1	0	DRB1*16:02:01
PLH	CZUH02000001	77	DRB4*01:01:01:01	DRB7/DRB8	4	2	3	1	1	0	1	3	1	DRB1*07:01:01:01
PITOUT	CZTZ02000001	78	DRB4*01:01:01:01	DRB7/DRB8	4	2	3	1	1	0	1	2	0	DRB1*07:01:01:01
OMW	CZUD02000001	80	DRB3*01:01:02:01	DRB2	4	2	1	0	0	0	0	0	2	DRB1*13:01:01
MZO70782	CZUF02000001	81		DRB6	5	1	0	0	0	0	0	0	0	DRB1*01:02:01
MT14B	CZTX02000001	82	DRB4*01:03:01:01	DRB7/DRB8	3	3	3	1	1	0	0	0	0	DRB1*04:04:01
MOU	CZTY02000001	83	DRB4*01:01:01:01	DRB7/DRB8	3	2	2	1	1	1	0	1	0	DRB1*07:01:01:01
MGAR	CZTT02000001	84	DRB5*01:01:01	DRB6	3	3	2	0	0	0	1	1	0	DRB1*15:01:01:01
MCF	CZTW02000001	85	DRB4*01:03:01:01	DRB7/DRB8	3	2	2	1	2	0	0	0	0	DRB1*04:01:01
MADURA	CZTR02000001	86	0	0	1	1	0	0	0	0	0	0	0	DRB1*08:01:01
LWAGS	CZTU02000001	87		DRB6	4	3	0	0	0	0	0	0	0	DRB1*01:02:01
LUY	CZTQ02000001	88	0	0	1	1	0	0	0	0	0	0	0	DRB1*08:03:02
LKT3	CZTL02000001	89	DRB4*01:03:01:01	DRB7/DRB8	4	2	2	1	2	0	0	2	0	DRB1*04:05:01
LD2B	CZTM02000001	90	DRB5*01:01:01	DRB6	2	2	2	0	0	0	1	1	0	DRB1*15:01:01:01
LBF	CZSI02000001	91	DRB4*01:03:01:01	DRB7/DRB8	4	2	4	1	1	0	0	3	0	DRB1*07:01:01:01
KRC005	CZTC02000001	92	0	0	1	1	0	0	0	0	0	0	0	DRB1*08:01:01
KAWASAKI	CZSC02000001	93	DRB5*01:02	DRB6	3	2	3	0	0	0	1	1	0	DRB1*15:02:01
KAS116	CZSR02000001	94		DRB6	4	2	3	0	0	0	0	0	0	DRB1*01:01:01
WJRO76	CZUZ02000001	95	DRB5*02:02	DRB6	3	3	2	0	0	0	1	1	0	DRB1*16:02:01
			Total number of particular TE		300	212	139	24	26	8	21	42	41
			Averaage number per sequence		3.37	2.39	1.56	0.27	0.29	0.09	0.24	0.47	0.46
			Total number of sequences		89	89	89	89	89	89	89	89	89
			TE in DRB haplotype region		U1	sLTR12	HERV9-LTR12	LTR22	MER77B	HERVK14	sLTR14	LTR43	LTR5
